# Supplementary material
Source: PubMed Central journal article supplement (PMC2504844)
Supplement: 0801184105_0801184105SI.pdf [file 0801184105_0801184105SI.pdf]

# Supporting Information

Henn *et al.* 10.1073/pnas.0801184105

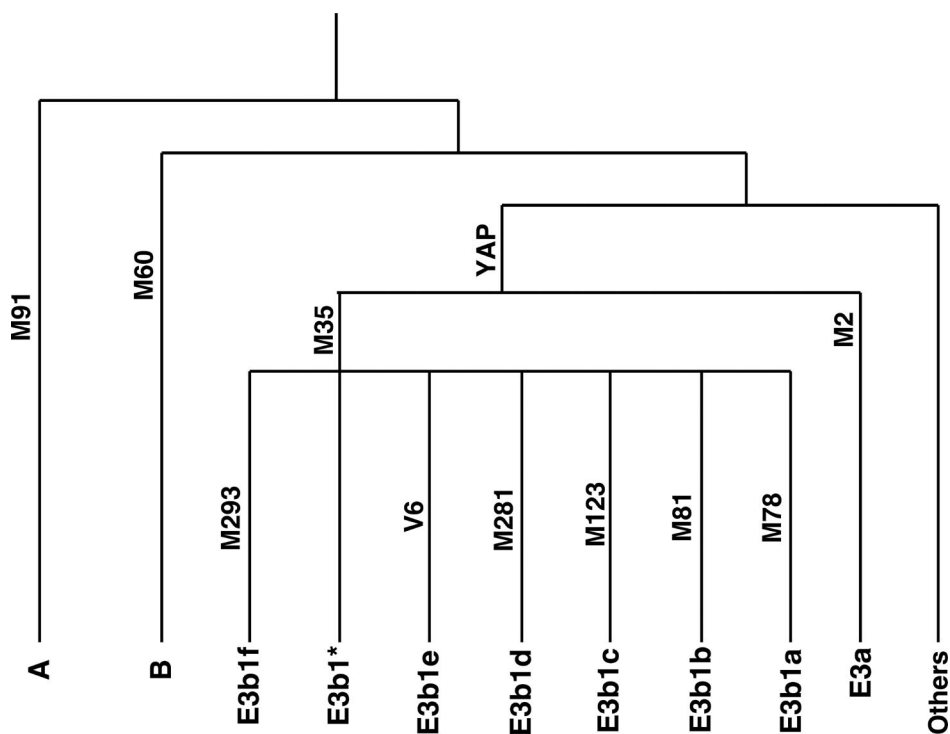

**Fig. S1.** Human Y-chromosome phylogeny for haplogroups common in African populations. Haplogroup names are indicated at the bottom of each branch. A defining unique event polymorphism (UEP) for each haplogroup is indicated alongside the appropriate branch. The reported M293 polymorphism defines the new haplogroup E3b1f-M293 that is derived from E3b1-M35, as shown.

## Other Supporting Information Files

[Dataset S1\(XLS\)](#)
